# Supplementary material
Source: Elsevier journal article supplement (https://www.sciencedirect.com/science/article/pii/S188840081730048X)
Supplement: mmc1 [file S188840081730048X:mmc1.xlsx]

## Sheet: Estudio de la linealidad
		MATERIAL SUPLEMENTARIO 1. EJEMPLO DE ESTIMACIÓN DEL INTERVALO DE MEDIDA
			COMISIÓN DE METROLOGÍA Y SISTEMAS ANALÍTICOS			ESTUDIO DE LA LINEALIDAD EN LA VALIDACIÓN DE UN PROCEDIMIENTO CROMATOGRÁFICO
		Magnitud	San¾Ciclosporina; c.masa					Unidad de medida	µg/L
		Muestra I	Material de valor bajo con un valor cercano al límite de cuantificación (c1)					Valor teórico muestra I (c1)	12
		Muestra II	Material de valor elevado (c6)					Valor teórico muestra I (c1)	12
		Fecha del estudio						Valor teórico muestra II (c6)	1800
				Solución A	Solución B	Solución C	Solución D	Solución E	Solución F
			Muestra I (mL)	250	200	150	100	50	0
			Muestra II (mL)	0	50	100	150	200	250
				c1	c2	c3	c4	c5	c6
			Valor teórico	12	369.6	727.2	1084.8	1442.4	1800
			Media del resultado obtenido	12.0667	334.5	698.967	1012.83	1442.67	1658.67
			Resultado obtenidos en la recta de regresión	11.9167	351.12	690.323	1029.53	1368.73	1707.93
			Dif. entre resultados obtenidos y según recta de regresión (%)	1.25874	-4.73342	1.25207	-1.62146	5.40184	-2.88458
			Requisito Diferencias (%)	£ ± 20%	£ ± 15%	£ ± 15%	£ ± 15%	£ ± 15%	£ ± 15%
				Resultado 1	Resultado 2	Resultado 3	Media	Desv. resultado 1 (%)	Desv. resultado 2 (%)	Desv. resultado 3 (%)	Desv. media (%)	CV (%)
			Solució A	14.1	12.2	9.9	12.0667	17.5	1.66667	-17.5	0.555556	17.4296
			Solució B	333.5	345.5	324.5	334.5	-9.76732	-6.52056	-12.2024	-9.49675	3.14967
			Solució C	685	701	710.9	698.967	-5.80308	-3.60286	-2.24147	-3.88247	1.86979
			Solució D	985.5	1052	1001	1012.83	-9.15376	-3.0236	-7.72493	-6.6341	3.43526
			Solució E	1542	1342	1444	1442.67	6.90516	-6.96062	0.110926	0.0184877	6.93207
			Solució F	1753	1658	1565	1658.67	-2.61111	-7.88889	-13.0556	-7.85185	5.66731
			Ordenada en el origen	0.534004			Requisito Desv. (%)	£ ± 15/20%	£ ± 15%	£ ± 15%	£ ± 15%	-
			Pendiente:	0.948555			Requisito CV (%)	-	-	-	-	£ 15/20%
			Coeficiente de correlación:	0.99815
			Coeficiente de determinación:	0.996304
		CONCLUSIÓN:	El intervalo de medida es lineal entre (12,0-1800) mg/L ya que:
			- Se cumplen los diferentes requisitos de imprecisión y de desviación exigidos (≤ 15 % o ≤ 20 % a valores cercanos al límite de cuantificación)
			- Se observa, mediante inspección visual de la gráfica (media de valores obtenidos vs valores teóricos), la linealidad en el intervalo de valores estudiado.
			- Se observa, en la gráfica de las diferencias, que cada uno de los valores no supera el correspondiente requisito metrológico (≤ 15 %).
