# Supplementary material
Source: Elsevier journal article supplement (https://www.sciencedirect.com/science/article/pii/S188840081730048X)
Supplement: mmc2 [file S188840081730048X:mmc2.xlsx]

## Sheet: Estudi de la selectivitat
	MATERIAL SUPLEMENTARIO 2. EJEMPLO DE ESTUDIO DE LA SELECTIVIDAD
		COMISIÓN DE METROLOGÍA Y SISTEMAS ANALÍTICOS			ESTUDIO DE LA SELECTIVIDAD EN LA VALIDACIÓN DE UN PROCEDIMIENTO CROMATOGRÁFICO
	Fecha del estudio
	Magnitud	San¾Ciclosporina; c.masa
	Unidad de medida	µg/L
	Patrón interno	D12-Ciclosporina A
	Posible interferente en la muestra del paciente 1	Ciclosporina D
	Posible interferente en la muestra del paciente 2	Everolimus
	Posible interferente en la muestra del paciente 3	Sirolimus
	Posible interferente en la muestra del paciente 4	Tacrolimus
	Posible interferente en la muestra del paciente 5	AM1 (metabolito de la ciclosporina A)
	Posible interferente en la muestra del paciente 6	AM19 (metabolito de la ciclosporina A)
		Área analito	Área patrón interno	% Área analito	% Área patrón interno	Requisito % Área
	Material de valor bajo	5654	15214	-	-	-
	Muestra del paciente 1	468	514	8.27733	3.37847	< 20 % Analito; < 5 % Estándar interno
	Muestra del paciente 2	545	339	9.63919	2.22821	< 20 % Analito; < 5 % Estándar interno
	Muestra del paciente 3	368	652	6.50867	4.28553	< 20 % Analito; < 5 % Estándar interno
	Muestra del paciente 4	444	442	7.85285	2.90522	< 20 % Analito; < 5 % Estándar interno
	Muestra del paciente 5	998	652	17.6512	4.28553	< 20 % Analito; < 5 % Estándar interno
	Muestra del paciente 6	887	555	15.688	3.64796	< 20 % Analito; < 5 % Estándar interno
	CONCLUSIÓN:	El sistema de medida evaluado es selectivo (no existe una interferencia significativa por la presencia de los interferentes estudiados) ya que, para cada interferente y muestra de paciente:
		- El área bajo la curva del pico cromatográfico (área) obtenida, en el tiempo de retención del analito, es ≤ al 20 % del área obtenida para la muestra de valor bajo
		- El área bajo la curva del pico cromatográfico (área) obtenida, en el tiempo de retención del patrón interno, es ≤ al 5 % del área obtenida para la muestra de valor bajo
