# Supplementary material
Source: Elsevier journal article supplement (https://www.sciencedirect.com/science/article/pii/S188840081730048X)
Supplement: mmc3 [file S188840081730048X:mmc3.xlsx]

## Sheet: Estudio contaminación
	MATERIAL SUPLEMENTARIO 3. EJEMPLO DE ESTUDIO DE LA CONTAMINACIÓN POR ARRASTRE
		COMISIÓN DE METROLOGÍA Y SISTEMAS ANALÍTICOS			ESTUDIO DE LA CONTAMINACIÓN POR ARRASTRE EN LA VALIDACIÓN DE UN PROCEDIMIENTO CROMATOGRÁFICO
	Fecha del estudio
	Magnitud	San¾Ciclosporina; c.masa
	Unidad de medida	µg/L
	Patrón interno	D12-Ciclosporina A
		Área analito	Área patrón interno	% Área analito	% Área patrón interno	Requisito % Área
	Material de bajo valor	5559	16214	-	-	-
	Resultado 1 obtenido en el material de blanco	901	545	16.208	3.36129	< 20 % Analito; < 5 % Estándar interno
	Resultado 2 obtenido en el material de blanco	545	443	9.80392	2.73221	< 20 % Analito; < 5 % Estándar interno
	Resultado 3 obtenido en el material de blanco	398	399	7.15956	2.46084	< 20 % Analito; < 5 % Estándar interno
	CONCLUSIÓN:	El sistema de medida evaluado no presenta una contaminación por arrastre significativa ya que, para cada material de blanco:
		- El área bajo la curva del pico cromatográfico (área) obtenida, en el tiempo de retención del analito, es ≤ al 20 % del área obtenida para el material de blanco
		- El área bajo la curva del pico cromatográfico (área) obtenida, en el tiempo de retención del patrón interno, es ≤ al 5 % del área obtenida para el material de blanco
