# Supplementary material
Source: Elsevier journal article supplement (https://www.sciencedirect.com/science/article/pii/S188840081730048X)
Supplement: mmc4 [file S188840081730048X:mmc4.xlsx]

## Sheet: Recuperación
	MATERIAL SUPLEMENTARIO 4. EJEMPLO DE ESTUDIO DE LA EFICIENCIA CROMATOGRÁFICA. PARTE I: ESTUDIO DE LA RECUPERACIÓN
		COMISIÓN DE METROLOGÍA Y SISTEMAS ANALÍTICOS			ESTUDIO DE LA EFICIENCIA CROMATOGRÁFICA EN LA VALIDACIÓN DE UN SISTEMA CROMATOGRÁFICO
	Fecha del estudio
	Magnitud	San¾Ciclosporina A; c.masa
	Valores en estudio de la magnitud	60, 190, 750
	Estándar interno	D12-Ciclosporina A
	Valor en estudio del estándar interno	200
	Unidad de medida	µg/L
		Valor de la magnitud = 60 µg/L								Valor de la magnitud = 60 µg/L								Valor de la magnitud = 750 µg/L								Valor estándar interno = 200 µg/L
		Área analito pre-extrac 1	Área analito pre-extrac 2	Área analito pre-extrac 3	Media intra	s	CV (%)			Área analito pre-extrac 1	Área analito pre-extrac 2	Área analito pre-extrac 3	Media intra	s	CV (%)			Área analito pre-extrac 1	Área analito pre-extrac 2	Área analito pre-extrac 3	Media intra	s	CV (%)			AUC RII pre-extrac 1	AUC RII pre-extrac 2	AUC RII pre-extrac 3	Media intra	s	CV (%)
	Paciente 1	30145	29854	27547	29182	1423.41	4.87769		Paciente 1	214541	232541	256214	234432	20900.8	8.91549		Paciente 1	1012455	1121244	1054121	1.06261e+06	54888.7	5.16547		Paciente 1	165458	154578	175421	165152	10424.9	6.31227
	Paciente 2	27857	28545	28545	28315.7	397.217	1.40282		Paciente 2	200212	189548	199999	196586	6096.31	3.10108		Paciente 2	1222315	1454124	1336521	1.33765e+06	115909	8.66507		Paciente 2	175452	181545	198754	185250	12084.8	6.52351
	Paciente 3	32542	30125	32545	31737.3	1396.32	4.39962		Paciente 3	189954	201457	214521	201977	12291.8	6.08571		Paciente 3	999854	1254121	1111224	1121733	127459	11.3627		Paciente 3	155445	145684	155455	152195	5638.4	3.70473
	Paciente 4	22235	25456	22454	23381.7	1799.76	7.69731		Paciente 4	201256	222121	199884	207754	12461.4	5.99815		Paciente 4	1122114	1333254	1098545	1.18464e+06	129244	10.91		Paciente 4	187545	187896	178754	184732	5179.79	2.80395
	Paciente 5	27458	31021	25454	27977.7	2819.65	10.0782		Paciente 5	254545	254785	214544	241291	23164.2	9.60009		Paciente 5	1098574	1119554	995455	1.07119e+06	66425.7	6.20109		Paciente 5	145256	158475	165287	156339	10184.8	6.51458
	Paciente 6	23522	27545	27125	26064	2211.43	8.48462		Paciente 6	232145	222225	200001	218124	16459.8	7.54608		Paciente 6	974554	1000012	1112445	1.029e+06	73374.9	7.13067		Paciente 6	178955	185452	175545	179984	5033.02	2.79637
	Media entre pacientes	27293.2	28757.7	27278.3					Media entre pacientes	215442	220446	214194					Media entre pacientes	1.07164e+06	1.21372e+06	1.11805e+06					Media entre pacientes	168018	168938	174869
	s entre pacientes	3894.48	2030.32	3347.84					s entre pacientes	24048.6	23007.4	21788.2					s entre pacientes	93869.9	165412	116021					s entre pacientes	15741.2	18152.1	14526.3
	CV (%) entre pacientes	14.2691	7.0601	12.2729					CV (%) entre pacientes	11.1624	10.4367	10.1722					CV (%) entre pacientes	8.75943	13.6285	10.3771					CV (%) entre pacientes	9.36874	10.7448	8.30694
		Valor de la magnitud = 60 µg/L								Valor de la magnitud = 190 µg/L								Valor de la magnitud = 750 µg/L								Valor estándar interno = 200 µg/L
		Área analito post-extrac 1	Área analito post-extrac 2	Área analito post-extrac 3	Media intra	s	CV (%)			Área analito post-extrac 1	Área analito post-extrac 2	Área analito post-extrac 3	Media intra	s	CV (%)			Área analito post-extrac 1	Área analito post-extrac 2	Área analito post-extrac 3	Mitjana	s	CV (%)			AUC RII post-extrac 1	AUC RII post-extrac 2	AUC RII post-extrac 3	Media intra	s	CV (%)
	Paciente 1	32605	33541	30054	32066.7	1804.76	5.62814		Paciente 1	222145	263245	275465	253618	27933.1	11.0138		Paciente 1	1236552	1321451	1214552	1.25752e+06	56449.4	4.48896		Paciente 1	187454	175455	183547	182152	6119.93	3.35979
	Paciente 2	28547	30142	29999	29562.7	882.494	2.98517		Paciente 2	235412	222544	202985	220314	16328.1	7.41132		Paciente 2	1452214	1714544	1458544	1.54177e+06	149662	9.7072		Paciente 2	191545	195424	201214	196061	4865.87	2.48182
	Paciente 3	35012	36214	38125	36450.3	1569.9	4.30695		Paciente 3	199654	221425	235452	218844	18038.1	8.24244		Paciente 3	1202541	1555265	1356255	1.37135e+06	176846	12.8957		Paciente 3	165456	154574	165452	161827	6281.57	3.88165
	Paciente 4	25652	29545	27754	27650.3	1948.57	7.04718		Paciente 4	245854	231002	222564	233140	11791.3	5.0576		Paciente 4	1225652	1452654	1145521	1274609	159312	12.4989		Paciente 4	175455	195224	188854	186511	10090.6	5.4102
	Paciente 5	29871	32145	30121	30712.3	1247.01	4.06028		Paciente 5	285455	265641	265412	272169	11506.3	4.22762		Paciente 5	1112214	1366524	1112552	1.1971e+06	146728	12.257		Paciente 5	165245	169875	175985	170368	5386.97	3.16195
	Paciente 6	25458	32111	28954	28841	3327.94	11.5389		Paciente 6	256587	226884	214568	232680	21600.7	9.28346		Paciente 6	998574	1115562	1255663	1.12327e+06	128718	11.4592		Paciente 6	179545	195654	183595	186265	8379.76	4.49884
	Media entre pacientes	29524.2	32283	30834.5					Media entre pacientes	240851	238457	236074					Media entre pacientes	1.20462e+06	1421000	1.25718e+06					Media entre pacientes	177450	181034	183108
	s entre pacientes	3800.27	2415.14	3687.64					s entre pacientes	29458	20426.6	28819					s entre pacientes	150840	205605	130819					s entre pacientes	10953.9	17192.7	12031.2
	CV (%) entre pacientes	12.8717	7.48115	11.9595					CV (%) entre pacientes	12.2308	8.56618	12.2076					CV (%) entre pacientes	12.5217	14.469	10.4057					CV (%) entre pacientes	6.17293	9.49695	6.57054
		Valor de la magnitud = 60 µg/L								Valor de la magnitud = 190 µg/L								Valor de la magnitud = 750 µg/L								Valor estándar interno = 200 µg/L
		RE (%) 1	RE (%) 2	RE (%) 3	Media intra	s	CV (%)			RE (%) 1	RE (%) 2	RE (%) 3	Media intra	s	CV (%)			RE (%) 1	RE (%) 2	RE (%) 3	Media intra	s	CV (%)			RE (%) 1	RE (%) 2	RE (%) 3	Media intra	s	CV (%)
	Paciente 1	92.4551	89.0075	91.6583	91.0403	1.80501	1.98265		Paciente 1	96.577	88.3363	93.0115	92.6416	4.13277	4.46103		Paciente 1	81.8773	84.8495	86.7909	84.5059	2.47478	2.92853		Paciente 1	88.2659	88.1012	95.5728	90.6466	4.26697	4.70725
	Paciente 2	97.5829	94.7017	95.1532	95.8126	1.54967	1.61739		Paciente 2	85.0475	85.1733	98.529	89.5832	7.74747	8.64835		Paciente 2	84.1691	84.8111	91.6339	86.8714	4.13696	4.76217		Paciente 2	91.5983	92.898	98.7774	94.4246	3.82527	4.05114
	Paciente 3	92.9453	83.1861	85.3639	87.1651	5.12286	5.87719		Paciente 3	95.1416	90.982	91.1103	92.4113	2.36536	2.5596		Paciente 3	83.1451	80.6371	81.9333	81.9052	1.25423	1.53132		Paciente 3	93.9494	94.2487	93.9578	94.052	0.170428	0.181207
	Paciente 4	86.6794	86.1601	80.9037	84.581	3.19529	3.77778		Paciente 4	81.86	96.1554	89.8097	89.275	7.16272	8.02321		Paciente 4	91.5524	91.7806	95.8992	93.0774	2.44639	2.62834		Paciente 4	106.891	96.2464	94.652	99.263	6.65368	6.70308
	Paciente 5	91.9219	96.5033	84.5058	90.977	6.05432	6.65477		Paciente 5	89.1717	95.9133	80.8343	88.6398	7.55354	8.52161		Paciente 5	98.7736	81.9271	89.4749	90.0586	8.43839	9.36989		Paciente 5	87.9034	93.2892	93.9211	91.7046	3.30701	3.60616
	Paciente 6	92.3953	85.7806	93.6831	90.6197	4.23995	4.67884		Paciente 6	90.4742	97.9465	93.211	93.8772	3.78046	4.02702		Paciente 6	97.5946	89.642	88.5942	91.9436	4.92185	5.35311		Paciente 6	99.6714	94.7857	95.6153	96.6908	2.61438	2.70385
	Media entre pacientes	92.33	89.2232	88.5447					Media entre pacientes	89.712	92.4178	91.0843					Media entre pacientes	89.5187	85.6079	89.0544					Media entre pacientes	94.7132	93.2615	95.4161
	s entre pacientes	3.46663	5.30552	5.73733					s entre pacientes	5.67263	5.05882	5.8369					s entre pacientes	7.51854	4.33226	4.68459					s entre pacientes	7.36343	2.79172	1.80602
	CV (%) entre pacientes	3.75461	5.94635	6.47959					CV (%) entre pacientes	6.32316	5.47385	6.40824					CV (%) entre pacientes	8.39885	5.06058	5.26037					CV (%) entre pacientes	7.77445	2.99343	1.89278
		Valor de la magnitud = 60 µg/L								Valor de la magnitud = 190 µg/L								Valor de la magnitud = 750 µg/L
		n-RE (%) 1	n-RE (%) 2	n-RE (%) 3	Media intra	s	CV (%)			n-RE (%) 1	n-RE (%) 2	n-RE (%) 3	Media intra	s	CV (%)			n-RE (%) 1	n-RE (%) 2	n-RE (%) 3	Media intra	s	CV (%)
	Paciente 1	104.746	101.029	95.9042	100.56	4.43958	4.41487		Paciente 1	109.416	100.267	97.32	102.334	6.30743	6.16356		Paciente 1	92.762	96.3091	90.8113	93.2941	2.78722	2.98756
	Paciente 2	106.534	101.942	96.3309	101.602	5.1098	5.02923		Paciente 2	92.8483	91.6847	99.7485	94.7605	4.35871	4.59971		Paciente 2	91.8893	91.2949	92.7681	91.9841	0.74116	0.805748
	Paciente 3	98.9312	88.2623	90.8535	92.6823	5.56459	6.00393		Paciente 3	101.269	96.534	96.9694	98.2574	2.61709	2.6635		Paciente 3	88.4998	85.5578	87.2022	87.0866	1.47442	1.69305
	Paciente 4	81.0917	89.5204	85.4749	85.3623	4.21548	4.93834		Paciente 4	76.5829	99.9055	94.8841	90.4575	12.2753	13.5702		Paciente 4	85.6505	95.36	101.318	94.1094	7.90809	8.40308
	Paciente 5	104.572	103.445	89.9754	99.3307	8.12154	8.17626		Paciente 5	101.443	102.813	86.0662	96.774	9.29844	9.60841		Paciente 5	112.366	87.8206	95.2661	98.4843	12.5852	12.7789
	Paciente 6	92.6999	90.4995	97.9791	93.7262	3.84397	4.10128		Paciente 6	90.7725	103.335	97.4854	97.1975	6.28607	6.46731		Paciente 6	97.9163	94.5733	92.6569	95.0489	2.66176	2.80041
	Media entre pacientes	98.0957	95.783	92.753					Media entre pacientes	95.3886	99.0898	95.4123					Media entre pacientes	94.8474	91.8193	93.3371
	s entre pacientes	9.76024	7.04067	4.78201					s entre pacientes	11.3966	4.36575	4.83305					s entre pacientes	9.532	4.37608	4.73736
	CV (%) entre pacientes	9.94972	7.35065	5.15564					CV (%) entre pacientes	11.9476	4.40585	5.06544					CV (%) entre pacientes	10.0498	4.76597	5.07554
		n-RE global		CONCLUSIÓN:	El sistema de medida evaluado (que incluye el procedimiento de extracción o preparación de muestras) presenta una recuperación aceptable ya que:
	Media global (%)	95.1695			- Para cada solución de trabajo estudiada, el coeficiente de variación entre replicados es ≤ 15 %.
	s global (%)	7.04688			- Los diferentes valores de recuperación normalizados son reproducibles e independientes del valor de la solución de trabajo.
	CV global (%)	7.40456			Es decir, que el valor del porcentaje de recuperación conjunto o global normalizado (media de todos los valores de recuperación normalizados) presenta un coeficiente de variación ≤ 15 % y este valor está dentro del intervalo [85-115] %.
