# Supplementary material
Source: Elsevier journal article supplement (https://www.sciencedirect.com/science/article/pii/S188840081730048X)
Supplement: mmc5 [file S188840081730048X:mmc5.xlsx]

## Sheet: Efecto matriz
	MATERIAL SUPLEMENTARIO 5. EJEMPLO DE ESTUDIO DE LA EFICIENCIA CROMATOGRÁFICA. PARTE II: ESTUDIO DEL EFECTO MATRIZ
		COMISIÓN DE METROLOGÍA Y SISTEMAS ANALÍTICOS			ESTUDIO DE LA EFICIENCIA CROMATOGRÁFICA EN LA VALIDACIÓN DE UN SISTEMA CROMATOGRÁFICO
	Fecha del estudio
	Magnitud	San¾Ciclosporina A; c.masa
	Valores en estudio de la magnitud	60, 190, 750
	Estándar interno	D12-Ciclosporina A
	Valor en estudio del estándar interno	200
	Unidad de medida	µg/L
		Valor de la magnitud = 60 µg/L								Valor de la magnitud = 190 µg/L								Valor de la magnitud = 750 µg/L								Valor estándar interno = 200 µg/L
		Área analito pre-extrac 1	Área analito pre-extrac 2	Área analito pre-extrac 3	Media intra	s	CV (%)			Área analito pre-extrac 1	Área analito pre-extrac 2	Área analito pre-extrac 3	Media intra	s	CV (%)			Área analito pre-extrac 1	Área analito pre-extrac 2	Área analito pre-extrac 3	Media intra	s	CV (%)			AUC RII pre-extrac 1	AUC RII pre-extrac 2	AUC RII pre-extrac 3	Media intra	s	CV (%)
	Paciente 1	30145	29854	27547	29182	1423.41	4.87769		Paciente 1	214541	232541	256214	234432	20900.8	8.91549		Paciente 1	1012455	1121244	1054121	1.06261e+06	54888.7	5.16547		Paciente 1	165458	154578	175421	165152	10424.9	6.31227
	Paciente 2	27857	28545	28545	28315.7	397.217	1.40282		Paciente 2	200212	189548	199999	196586	6096.31	3.10108		Paciente 2	1222315	1454124	1336521	1.33765e+06	115909	8.66507		Paciente 2	175452	181545	198754	185250	12084.8	6.52351
	Paciente 3	32542	30125	32545	31737.3	1396.32	4.39962		Paciente 3	189954	201457	214521	201977	12291.8	6.08571		Paciente 3	999854	1254121	1111224	1121733	127459	11.3627		Paciente 3	155445	145684	155455	152195	5638.4	3.70473
	Paciente 4	22235	25456	22454	23381.7	1799.76	7.69731		Paciente 4	201256	222121	199884	207754	12461.4	5.99815		Paciente 4	1122114	1333254	1098545	1.18464e+06	129244	10.91		Paciente 4	187545	187896	178754	184732	5179.79	2.80395
	Paciente 5	27458	31021	25454	27977.7	2819.65	10.0782		Paciente 5	254545	254785	214544	241291	23164.2	9.60009		Paciente 5	1098574	1119554	995455	1.07119e+06	66425.7	6.20109		Paciente 5	145256	158475	165287	156339	10184.8	6.51458
	Paciente 6	23522	27545	27125	26064	2211.43	8.48462		Paciente 6	232145	222225	200001	218124	16459.8	7.54608		Paciente 6	974554	1000012	1112445	1.029e+06	73374.9	7.13067		Paciente 6	178955	185452	175545	179984	5033.02	2.79637
	Media entre pacientes	27293.2	28757.7	27278.3					Media entre pacientes	215442	220446	214194					Media entre pacientes	1.07164e+06	1.21372e+06	1.11805e+06					Media entre pacientes	168018	168938	174869
	s entre pacientes	3894.48	2030.32	3347.84					s entre pacientes	24048.6	23007.4	21788.2					s entre pacientes	93869.9	165412	116021					s entre pacientes	15741.2	18152.1	14526.3
	CV (%) entre pacientes	14.2691	7.0601	12.2729					CV (%) entre pacientes	11.1624	10.4367	10.1722					CV (%) entre pacientes	8.75943	13.6285	10.3771					CV (%) entre pacientes	9.36874	10.7448	8.30694
		Valor de la magnitud = 60 µg/L								Valor de la magnitud = 190 µg/L								Valor de la magnitud = 750 µg/L								Valor estándar interno = 200 µg/L
		Área analito fase móvil 1	Área analito fase móvil 2	Área analito fase móvil 3	Media intra	s	CV (%)			Área analito fase móvil 1	Área analito fase móvil 2	Área analito fase móvil 3	Media intra	s	CV (%)			Área analito fase móvil 1	Área analito fase móvil 2	Área analito fase móvil 3	Media intra	s	CV (%)			AUC RII fase mòbil 1	AUC RII fase mòbil 1	AUC RII fase mòbil 1	Media intra	s	CV (%)
	Paciente 1	25452	26524	23511	25162.3	1527.24	6.06956		Paciente 1	198545	201256	222145	207315	12914.2	6.22926		Paciente 1	854474	999554	978544	944191	78403.9	8.30382		Paciente 1	131245	133332	145221	136599	7539.15	5.51917
	Paciente 2	24521	24584	24589	24564.7	37.899	0.154283		Paciente 2	178547	169854	171214	173205	4676.02	2.6997		Paciente 2	1012214	1122414	1112211	1.08228e+06	60892.7	5.62634		Paciente 2	155224	154785	175544	161851	11860.5	7.32805
	Paciente 3	28454	25451	24785	26230	1954.62	7.45183		Paciente 3	174125	188445	200015	187528	12969.3	6.91593		Paciente 3	845224	1011211	954544	936993	84373.9	9.00475		Paciente 3	132522	131251	132521	132098	733.524	0.555288
	Paciente 4	22563	21452	21452	21822.3	641.436	2.93936		Paciente 4	188896	200002	169998	186299	15169.7	8.14267		Paciente 4	1000221	1122144	888554	1.00364e+06	116833	11.6409		Paciente 4	171454	171451	165524	169476	3422.82	2.01965
	Paciente 5	23545	25478	20125	23049.3	2710.7	11.7604		Paciente 5	222544	201252	201254	208350	12292.4	5.89986		Paciente 5	999955	998955	900055	966322	57390.8	5.9391		Paciente 5	131255	150225	132521	138000	10605.8	7.68533
	Paciente 6	20125	23524	21523	21724	1708.39	7.86407		Paciente 6	201221	199955	175854	192343	14294.2	7.43161		Paciente 6	754522	865415	1001221	873719	123559	14.1417		Paciente 6	155668	161524	155555	157582	3414.05	2.16652
	Media entre pacientes	24110	24502.2	22664.2					Media entre pacientes	193980	193461	190080					Media entre pacientes	911102	1.01995e+06	972522					Media entre pacientes	146228	150428	151148
	s entre pacientes	2808.3	1800.41	1904.68					s entre pacientes	17592.2	12560.8	21039.6					s entre pacientes	107819	95662.6	81238.2					s entre pacientes	16987.8	15774.3	17608.6
	CV (%) entre pacientes	11.6479	7.34796	8.40392					CV (%) entre pacientes	9.06907	6.49269	11.0688					CV (%) entre pacientes	11.8339	9.37916	8.35336					CV (%) entre pacientes	11.6173	10.4863	11.6499
		Valor de la magnitud = 60 µg/L								Valor de la magnitud = 190 µg/L								Valor de la magnitud = 750 µg/L								Valor estándar interno = W
		ME (%) 1	ME (%) 2	ME (%) 3	Media intra	s	CV (%)			ME (%) 1	ME (%) 2	ME (%) 3	Media intra	s	CV (%)			ME (%) 1	ME (%) 2	RE (%) 3	Media intra	s	CV (%)			ME (%) 1	ME (%) 2	ME (%) 3	Media intra	s	CV (%)
	Paciente 1	118.439	112.555	117.166	116.053	3.09591	2.66766		Paciente 1	108.057	115.545	115.336	112.979	4.26444	3.77453		Paciente 1	118.489	112.174	107.723	112.796	5.40944	4.7958		Paciente 1	126.068	115.935	120.796	120.933	5.06808	4.19082
	Paciente 2	113.605	116.112	116.088	115.268	1.4409	1.25004		Paciente 2	112.134	111.595	116.812	113.514	2.86939	2.52779		Paciente 2	120.757	129.553	120.168	123.493	5.25694	4.25689		Paciente 2	113.031	117.288	113.222	114.514	2.40474	2.09996
	Paciente 3	114.367	118.365	131.309	121.347	8.85608	7.29815		Paciente 3	109.091	106.905	107.252	107.749	1.1745	1.09003		Paciente 3	118.295	124.022	116.414	119.577	3.96256	3.31382		Paciente 3	117.298	110.996	117.306	115.2	3.64033	3.16001
	Paciente 4	98.5463	118.665	104.671	107.294	10.3126	9.61157		Paciente 4	106.543	111.059	117.58	111.728	5.54872	4.96629		Paciente 4	112.187	118.813	123.633	118.211	5.74686	4.86153		Paciente 4	109.385	109.592	107.993	108.99	0.869612	0.797884
	Paciente 5	116.619	121.756	126.48	121.618	4.93158	4.05496		Paciente 5	114.38	126.6	106.604	115.861	10.0802	8.70022		Paciente 5	109.862	112.073	110.599	110.845	1.12533	1.01523		Paciente 5	110.667	105.492	124.725	113.628	9.95269	8.75902
	Paciente 6	116.88	117.093	126.028	120	5.22128	4.35106		Paciente 6	115.368	111.138	113.731	113.412	2.13329	1.88101		Paciente 6	129.162	115.553	111.109	118.608	9.4062	7.93051		Paciente 6	114.959	114.814	112.851	114.208	1.17767	1.03116
	Media entre pacientes	113.076	117.424	120.29					Media entre pacientes	110.929	113.807	112.886					Media entre pacientes	118.125	118.698	114.941					Media entre pacientes	115.235	112.353	116.149
	s entre pacientes	7.33263	3.05719	9.63353					s entre pacientes	3.57576	6.83943	4.80366					s entre pacientes	6.8181	6.96473	6.17525					s entre pacientes	6.02708	4.46733	6.04074
	CV (%) entre pacientes	6.4847	2.60354	8.00856					CV (%) entre pacientes	3.22347	6.00968	4.25532					CV (%) entre pacientes	5.77193	5.86761	5.37254					CV (%) entre pacientes	5.23027	3.97616	5.20087
		Valor de la magnitud = 60 µg/L								Valor de la magnitud = 190 µg/L								Valor de la magnitud = 750 µg/L
		n-ME (%) 1	n-ME (%) 2	n-ME (%) 3	Media intra	s	CV (%)			n-ME (%) 1	n-ME (%) 2	n-ME (%) 3	Media intra	s	CV (%)			n-ME (%) 1	n-ME (%) 2	n-ME (%) 3	Media intra	s	CV (%)
	Paciente 1	93.9482	97.0846	96.9954	96.0094	1.78561	1.85982		Paciente 1	85.7129	99.6638	95.4804	93.619	7.15927	7.64723		Paciente 1	93.9879	96.7566	89.178	93.3075	3.83481	4.10987
	Paciente 2	100.507	98.997	102.532	100.679	1.77372	1.76176		Paciente 2	99.206	95.1454	103.171	99.1742	4.01299	4.04641		Paciente 2	106.834	110.457	106.135	107.809	2.31985	2.15182
	Paciente 3	97.5017	106.638	111.937	105.359	7.30238	6.93095		Paciente 3	93.0033	96.3138	91.4297	93.5823	2.49299	2.66396		Paciente 3	100.85	111.735	99.2398	103.942	6.79702	6.53928
	Paciente 4	90.0912	108.279	96.924	98.4314	9.1872	9.33361		Paciente 4	97.4021	101.339	108.878	102.54	5.8313	5.68687		Paciente 4	102.561	108.414	114.483	108.486	5.96098	5.4947
	Paciente 5	105.378	115.418	101.407	107.401	7.22111	6.72351		Paciente 5	103.355	120.009	85.4708	102.945	17.2729	16.7788		Paciente 5	99.2729	106.238	88.6745	98.0618	8.84426	9.01906
	Paciente 6	101.67	101.985	111.677	105.111	5.68847	5.41189		Paciente 6	100.356	96.798	100.78	99.3113	2.18692	2.20209		Paciente 6	112.354	100.644	98.4564	103.818	7.47297	7.19814
	Media entre pacientes	98.1828	104.734	103.579					Media entre pacientes	96.5058	101.545	97.535					Media entre pacientes	102.643	105.707	99.361
	s entre pacientes	5.53556	6.77223	6.76587					s entre pacientes	6.30201	9.33132	8.46167					s entre pacientes	6.34613	5.8695	9.93253
	CV (%) entre pacientes	5.63802	6.46615	6.53211					CV (%) entre pacientes	6.53019	9.18935	8.67552					CV (%) entre pacientes	6.18269	5.55259	9.9964
		n-ME global		CONCLUSIÓN:	El sistema de medida evaluado presenta unefecto matriz aceptable ya que:
	Mitjana global (%)	101.088			- Para cada solución de trabajo estudiada, el coeficiente de variación entre replicados es ≤ 15 %.
	s global (%)	7.52515			- Los diferentes valores de efecto matriz normalizados son reproducibles e independientes del valor de la solución de trabajo.
	CV global (%)	7.44415			Es decir, que el valor del porcentaje de efecto matriz conjunto o global normalizado (media de todos los valores de efecto matriz normalizados) presenta un coeficiente de variación ≤ 15 % y este valor está dentro del intervalo [85-115] %.
