# Supplementary material
Source: Elsevier journal article supplement (https://www.sciencedirect.com/science/article/pii/S188840081730048X)
Supplement: mmc6 [file S188840081730048X:mmc6.xlsx]

## Sheet: Estudio integr. diluciones
	MATERIAL SUPLEMENTARIO 6. EJEMPLO DE ESTUDIO DE LA INTEGRIDAD DE LAS DILUCIONES
		COMISIÓN DE METROLOGÍA Y SISTEMAS ANALÍTICOS			ESTUDIO DE LA INTEGRIDAD DE LAS DILUCIONES EN LA VALIDACIÓN DE UN PROCEDIMIENTO CROMATOGRÁFICO
	Fecha del estudio
	Magnitud	San¾Ciclosporina; c.masa
	Unidad de medida	µg/L
		Dilución 1/3	Dilución 1/5	Dilución 1/10
	Valor teórico de la dilución	1000	600	300
	Resultado 1	985	525	200
	Resultado 2	1251	531	256
	Resultado 3	1052	625	301
	Resultado 4	975	641	274
	Resultado 5	1002	684	299
	Resultado 6	1115	611	262
	Media	1063.33	602.833	265.333
	s	105.563	62.9616	37.0063
	CV	9.92752	10.4443	13.9471
	% Desviación	6.33333	0.472222	-11.5556
	Requisito CV (%)	0.15	0.15	0.15
	Requisito desviación (%)	0.15	0.15	0.15
	CONCLUSIÓN:	El sistema de medida evaluado presenta una integridad de las diluciones adecuada ya que, para cada dilución:
		- El coeficiente de variación obtenido entre replicados es ≤ 15 %.
		- El porcentaje de desviación (diferencia porcentual entre la media de los valores obtenidos y su correspondiente valor teórico dividido por el valor teórico) es ≤ 15 %.
