# Supplementary material
Source: Elsevier journal article supplement (https://www.sciencedirect.com/science/article/pii/S188840081730048X)
Supplement: mmc7 [file S188840081730048X:mmc7.xlsx]

## Sheet: Estab Sol. prim., sec., trabajo
	MATERIAL SUPLEMENTARIO 7. EJEMPLO DE ESTUDIO DE LA ESTABILIDAD. PARTE I: ESTABILIDAD DE LAS SOLUCIONES PRIMARIAS Y DE TRABAJO
		COMISIÓN DE METROLOGÍA Y SISTEMAS ANALÍTICOS			ESTUDIO DE LA ESTABILIDAD EN LA VALIDACIÓN DE UN PROCEDIMIENTO CROMATOGRÁFICO
	Fecha del estudio
	Magnitud	San¾Ciclosporina A; c.masa
	Unidad de medida	mg/L
	Estándar interno	D12-Ciclosporina A
	Periodo de tiempo del estudio	6 meses
	Condiciones de almacenamiento de las soluciones del analito	- 80 ºC
	Condiciones de almacenamiento de la soluciones est. Interno	- 80 ºC
		Valor teórico	Resultado 1	Resultado 2	Resultado 3	Resultado 4	Resultado 5	Resultado 6	PD (%)
	Solución primaria analito	2000	1875	1954	1800	1789	1921	1725	-7.8
	Solución secundaria analito 1	10	9.95	8.85	7.89	8.25	7.21	9.85	-13.3333
	Solución secundaria analito 2	7	6.65	6.89	5.99	6.22	5.85	6.91	-8.30952
	Solución secundaria analito 3	3.5	3.33	3.45	3.21	2.99	3.11	3.65	-6
	Solución secundaria analito 4	1.5	1.36	1.5	1.44	1.48	1.33	1.65	-2.66667
	Solución secundaria analito 5	0.5	0.448	0.498	0.455	0.498	0.478	0.466	-5.23333
	Solución secundaria analito 6	0.2	0.178	0.188	0.198	0.199	0.187	0.192	-4.83333
		Valor teórico	Resultado 1	Resultado 2	Resultado 3	Resultado 4	Resultado 5	Resultado 6	PD (%)
	Solución primaria estándar interno	1000	954	912	815	965	975	995	-6.4
	Solució de trabajo del estándar interno	0.2	0.168	0.18	0.198	0.185	0.18	0.175	-9.5
	CONCLUSIÓN:	Las diferentes soluciones primarias y secundarias son estables a -80 ºC durante 6 meses ya que las correspondientes diferencias relativas porcentuales (PD) están comprendidas entre ± 15 %.

## Sheet: Estab a corto plazo
	MATERIAL SUPLEMENTARIO 7. EJEMPLO DE ESTUDIO DE LA ESTABILIDAD. PARTE II: ESTABILIDAD A CORTO PLAZO
		COMISIÓN DE METROLOGÍA Y SISTEMAS ANALÍTICOS			ESTUDIO DE LA ESTABILIDAD EN LA VALIDACIÓN DE UN PROCEDIMIENTO CROMATOGRÁFICO
	Fecha del estudio
	Magnitud	San¾Ciclosporina A; c.masa
	Unidad de medida	µg/L
	Periodo de tiempo del estudio	1 semana
	Condiciones de almacenamiento de los materiales de control	(2-8) ºC
		Valor teórico	Resultado 1	Resultado 2	Resultado 3	Resultado 4	Resultado 5	Resultado 6	PD (%)
	Material de control 1	60	55.5	50.1	56.4	57.8	52.2	55.6	-9
	Material de control 2	190	175	182	172	188	165	174	-7.36842
	Material de control 3	750	721	711	732	714	733	722	-3.71111
	CONCLUSIÓN:	Los materiales de control son estables a (2-8) ºC durante 1 semana ya que las correspondientes diferencias relativas porcentuales (PD) están comprendidas entre ± 15 %.

## Sheet: Estab a largo plazo
	MATERIAL SUPLEMENTARIO 7. EJEMPLO DE ESTUDIO DE LA ESTABILIDAD. PARTE III: ESTABILIDAD A LARGO PLAZO
		COMISIÓN DE METROLOGÍA Y SISTEMAS ANALÍTICOS			ESTUDIO DE LA ESTABILIDAD EN LA VALIDACIÓN DE UN PROCEDIMIENTO CROMATOGRÁFICO
	Fecha del estudio
	Magnitud	San¾Ciclosporina A; c.masa
	Unidad de medida	µg/L
	Periodo de tiempo del estudio	6 meses
	Condiciones de almacenamiento de los materiales de control	- 80 ºC
		Valor teórico	Resultado 1	Resultado 2	Resultado 3	Resultado 4	Resultado 5	Resultado 6	PD (%)
	Material de control 1	60	58.2	55.9	57.1	59.4	57.3	58.8	-3.69444
	Material de control 2	190	184	189	181	176	174	171	-5.70175
	Material de control 3	750	732	742	728	745	739	722	-2.04444
	CONCLUSIÓN:	Los materiales de control son estables a -80 ºC ºC durante 6 meses ya que las correspondientes diferencias relativas porcentuales (PD) están comprendidas entre ± 15 %.

## Sheet: ciclos cong-descong.
	MATERIAL SUPLEMENTARIO 7. EJEMPLO DE ESTUDIO DE LA ESTABILIDAD. PARTE IV: Nº de CICLOS DE CONGELACIÓN-DESCONGELACIÓN
		COMISIÓN DE METROLOGÍA Y SISTEMAS ANALÍTICOS			ESTUDIO DE LA ESTABILIDAD EN LA VALIDACIÓN DE UN PROCEDIMIENTO CROMATOGRÁFICO
	Fecha del estudio
	Magnitud	San¾Ciclosporina A; c.masa
	Unidad de medida	µg/L
	Periodo de tiempo del estudio	Cada 24 horas
	Condiciones de almacenamiento de los materiales de control	- 80 ºC
		ANALITO. Ciclo congelación-descongelación 1
		Valor teórico	Resultado 1	Resultado 2	Resultado 3	Resultado 4	Resultado 5	Resultado 6	PD (%)
	Material de control 1	60	59.4	60.2	59.2	59.4	58.9	59.9	-0.833333
	Material de control 2	190	188	189	185	185	186	185	-1.92982
	Material de control 3	750	742	752	748	745	745	738	-0.666667
		ANALITO. Ciclo congelación-descongelación 2
		Valor teórico	Resultado 1	Resultado 2	Resultado 3	Resultado 4	Resultado 5	Resultado 6	PD (%)
	Material de control 1	60	55.2	52.2	56.5	54.2	53.3	52.9	-9.91667
	Material de control 2	190	178	161	169	168	185	174	-9.21053
	Material de control 3	750	689	705	709	708	700	699	-6.44444
		ANALITO. Ciclo congelación-descongelación 3
		Valor teórico	Resultado 1	Resultado 2	Resultado 3	Resultado 4	Resultado 5	Resultado 6	PD (%)
	Material de control 1	60	45.4	42.2	46.2	41.1	38.8	35.9	-30.6667
	Material de control 2	190	125	135	142	148	122	125	-30.0877
	Material de control 3	750	614	623	645	602	642	606	-17.0667
	CONCLUSIÓN:	Los materiales de control pueden congelerarse y descongelarse sólo 2 veces ya que únicamente las diferencias relativas porcentuales (PD) del primer y segundo ciclo están comprendidas entre ± 15 %.

## Sheet: Estab muest. pacientes
	MATERIAL SUPLEMENTARIO 7. EJEMPLO DE ESTUDIO DE LA ESTABILIDAD. PARTE V: ESTABILIDAD DE LAS MUESTRAS DE PACIENTES
		COMISIÓN DE METROLOGÍA Y SISTEMAS ANALÍTICOS			ESTUDIO DE LA ESTABILIDAD EN LA VALIDACIÓN DE UN PROCEDIMIENTO CROMATOGRÁFICO
	Fecha del estudio
	Magnitud	San¾Ciclosporina A; c.masa
	Unidad de medida	µg/L
	Periodo de tiempo del estudio	1 semana
	Condiciones de almacenamiento muestras de pacientes	(2-8) ºC
			Resultado t0	Resultado t1
		Muestra paciente 1	56	47
		Muestra paciente 2	111	89
		Muestra paciente 3	26	22
		Muestra paciente 4	236	199
		Muestra paciente 5	524	445
		Muestra paciente 6	79	71
		Muestra paciente 7	742	714
		Muestra paciente 8	336	299
		Muestra paciente 9	101	86
		Muestra paciente 10	175	151
		Muestra paciente 11	459	426
		Muestra paciente 12	85	69
		Muestra paciente 13	222	200
		Muestra paciente 14	605	555
		Muestra paciente 15	333	301
		Muestra paciente 16	214	201
		Muestra paciente 17	112	95
		Muestra paciente 18	269	225
		Muestra paciente 19	549	514
		Muestra paciente 20	99	85
		PD (%)	-12.3716
	CONCLUSIÓN:	Las muestras de pacientes son estables a (2-8) ºC durante 1 semana ya que la diferencia relativa porcentual (PD) está comprendida entre ± 15 %.

## Sheet: Estab muestreador
	MATERIAL SUPLEMENTARIO 7. EJEMPLO DE ESTUDIO DE LA ESTABILIDAD. PARTE VI: ESTABILIDAD DEL EXTRACTO EN EL MUESTREADOR
		COMISIÓN DE METROLOGÍA Y SISTEMAS ANALÍTICOS			ESTUDIO DE LA ESTABILIDAD EN LA VALIDACIÓN DE UN PROCEDIMIENTO CROMATOGRÁFICO
	Fecha del estudio
	Magnitud	San¾Ciclosporina A; c.masa
	Unidad de medida	µg/L
	Periodo de tiempo del estudio	12 horas
	Condiciones de almacenamiento de los extractos del materiales de control	Temperatura ambiente
		Valor teórico	Resultado 1	Resultado 2	Resultado 3	Resultado 4	Resultado 5	Resultado 6	PD (%)
	Extracto del material de control 1	60	51	52.5	47.7	51.1	53.9	49.9	-14.9722
	Extracto del material de control 2	190	162	169	161	170	165	159	-13.5088
	Extracto del material de control 3	750	642	644	637	650	634	622	-14.9111
	CONCLUSIÓN:	Los extractos de los materiales de control son estables a temperatura ambiente durante 12 horas ya que las correspondientes diferencias relativas porcentuales (PD) están comprendidas entre ± 15 %.
